# Supplementary material
Source: PubMed Central journal article supplement (PMC5862762)
Supplement: NIHMS936404-supplement-supplement_1.pdf [file NIHMS936404-supplement-supplement_1.pdf]

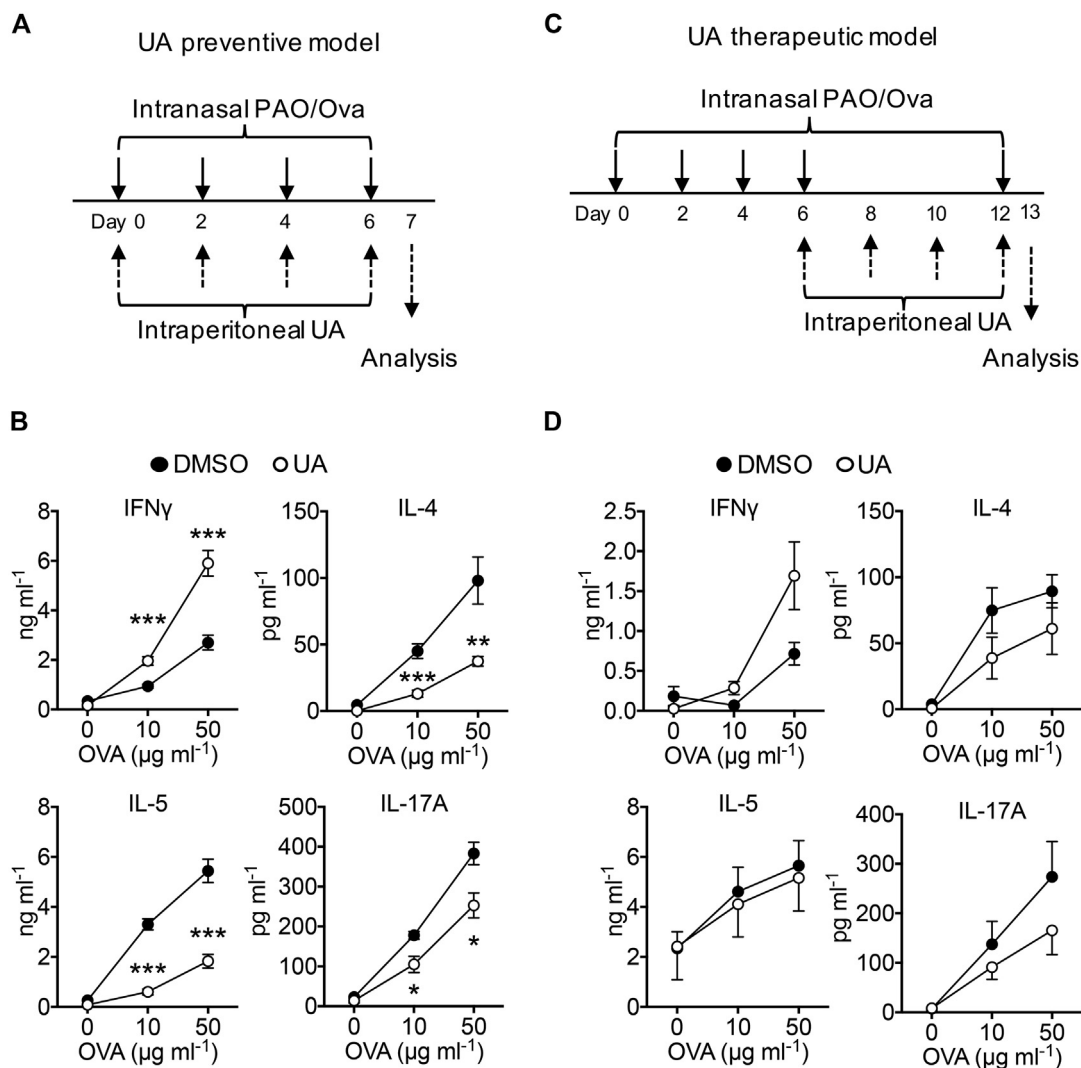

**FIG E1.** Preventive and therapeutic effects of UA on allergic asthma. **A** and **C**, Schematic diagram of experimental protocol for the UA preventive model used in Fig 3, A-D (Fig E1, A), or the UA therapeutic model used in Fig 3, E-H (Fig E1, C). **B** and **D**, Lymphoid cells from mediastinal lymph nodes were restimulated with OVA, and production of IFN- $\gamma$ , IL-4, IL-5, and IL-17A in culture media was determined. Data are representative of 3 independent experiments. The graph shows means  $\pm$  SEMs. \* $P < .05$ , \*\* $P < .01$ , and \*\*\* $P < .001$ .

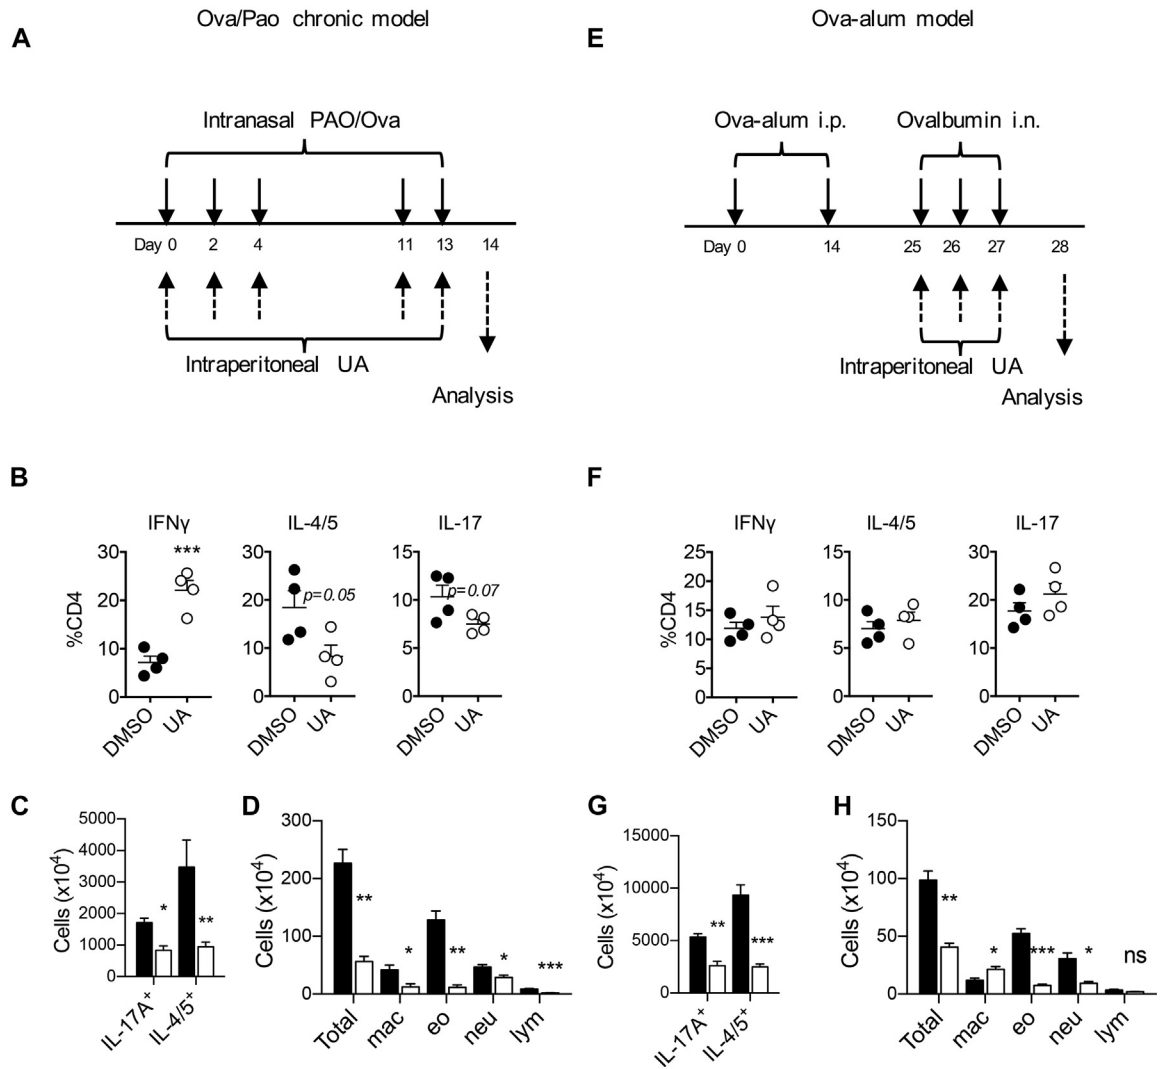

**FIG E2.** Effects of UA on a chronic asthma model. **A** and **E**, Schematic diagrams of experimental protocol for the chronic model using PAO/OVA (Fig E2, *B-D*) and OVA-alum (Fig E2, *F-H*), respectively. **B**, **C**, **F**, and **G**, Frequencies (Fig E2, *B* and *F*) and absolute numbers (Fig E2, *C* and *G*) of BAL fluid CD4<sup>+</sup> T-cell subsets. **D** and **H**, Absolute numbers of total cells, macrophages (*mac*), eosinophils (*eo*), neutrophils (*neu*), and lymphocytes (*lym*) in BAL fluid. The graph shows means  $\pm$  SEMs. \* $P < .05$ , \*\* $P < .01$ , and \*\*\* $P < .001$ .

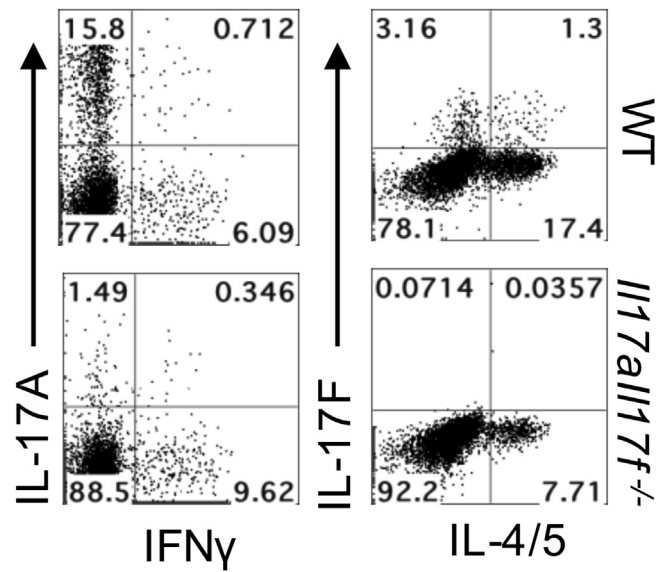

**FIG E3.** Representative FACS plot of BAL CD4<sup>+</sup> T cells of mice in Fig 1. BAL fluid cells were gated on CD45.2<sup>+</sup>TCR $\beta$ <sup>+</sup>CD4<sup>+</sup> cells. Data are representative of 2 independent experiments. WT, Wild-type.

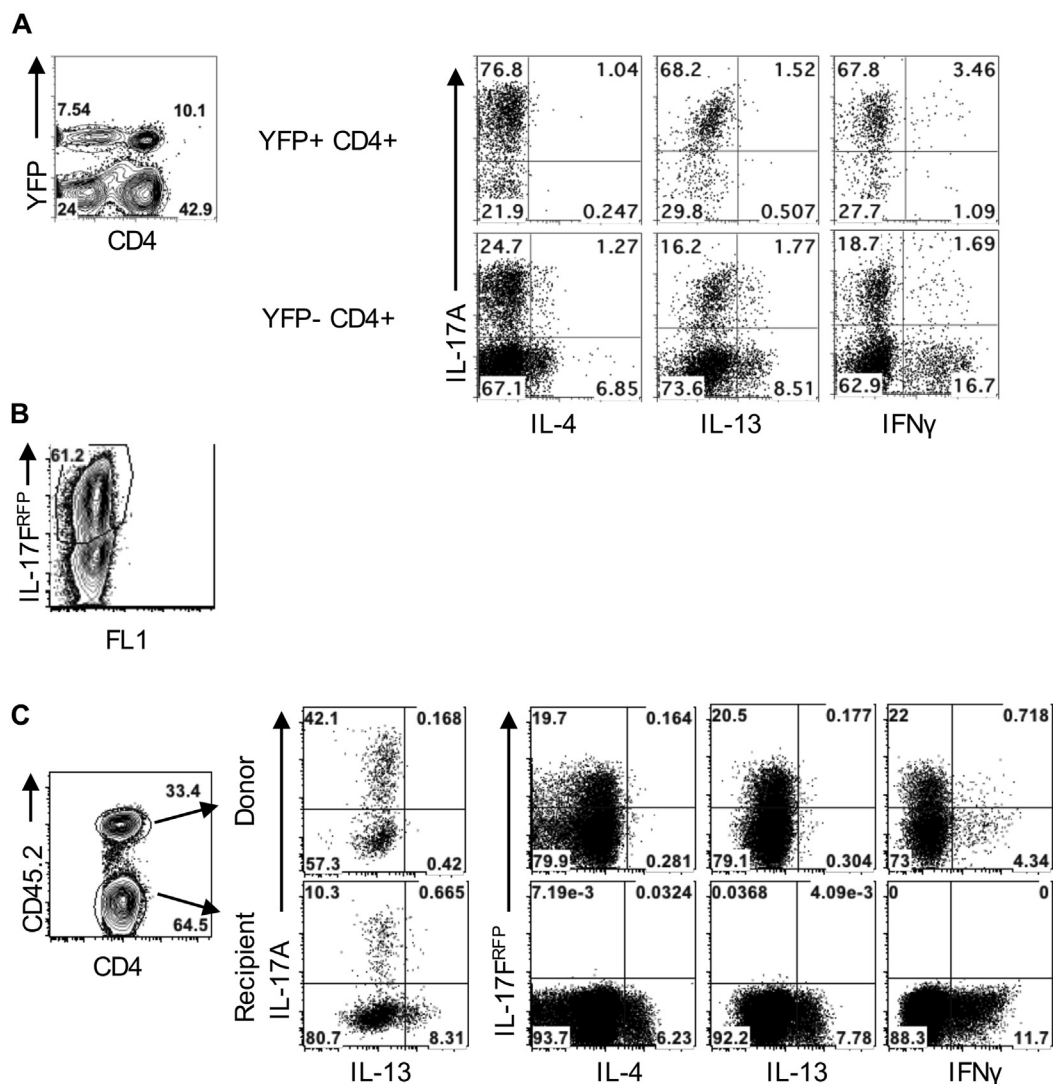

**FIG E4.** Plasticity and stability of  $T_H17$  cells during allergic asthma. **A**, Intracellular staining of IL-17A and other cytokines. Expression of indicated cytokines in lung enhanced YFP<sup>+</sup> or enhanced YFP<sup>-</sup> CD4<sup>+</sup> T cells is shown. **B** and **C**, Naive CD4<sup>+</sup>CD25<sup>-</sup>CD62L<sup>high</sup>CD44<sup>low</sup> T cells from *Il17f<sup>fp</sup>* × OT-II mice were stimulated under  $T_H17$  conditions, and RFP<sup>+</sup> cells were FACS sorted (Fig E4, B) and transferred into B6.SJL congenic mice (CD45.1<sup>+</sup>) before challenging the recipients with allergens. Frequencies of BAL fluid CD4<sup>+</sup> T-cell subsets were analyzed by using flow cytometry (Fig E4, C). Data are representative of 2 independent experiments (n = 3-4 per experiment).

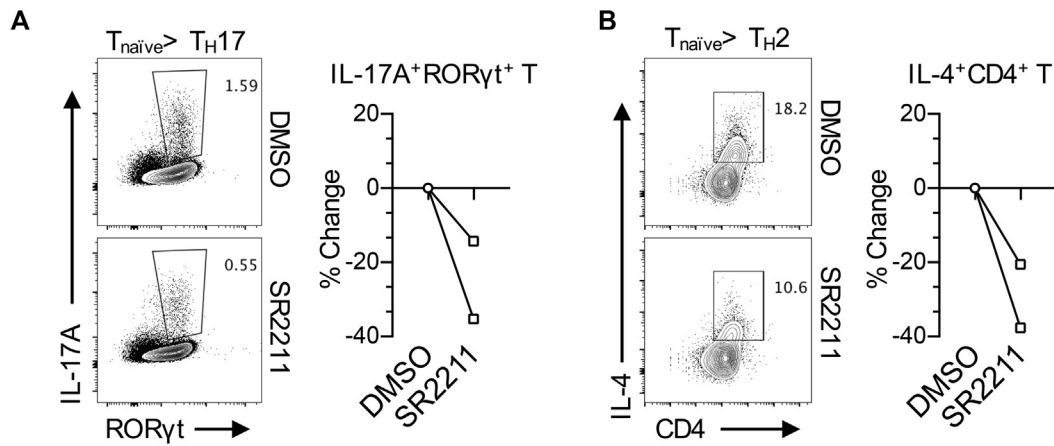

**FIG E5.** SR2211, another ROR $\gamma$ t inhibitor, negatively regulates differentiation of human T<sub>H</sub>2 cells. **A**, Representative FACS plot for *in vitro* T<sub>H</sub>17 differentiation and percentage changes in IL-17<sup>+</sup>ROR $\gamma$ t<sup>+</sup> T cells. **B**, Representative FACS plot for *in vitro* T<sub>H</sub>2 differentiation and percentage change in IL-4-producing T cells. Each *symbol* represents an individual donor.
